# Supplementary material for: Enhancer RNA-driven looping enhances the transcription of the long noncoding RNA DHRS4-AS1, a controller of the DHRS4 gene cluster
Source: PubMed Central journal article supplement (PMC4750091; doi:10.1038/srep20961), 2016-02-11
Supplement: srep20961-s1.pdf [file srep20961-s1.pdf]

**Enhancer RNA-driven looping enhances the transcription of the long noncoding RNA  
DHRS4-AS1, a controller of the *DHRS4* gene cluster**

Yingying Yang, Zhongjing Su, Xuhong Song, Bin Liang, Fanxing Zeng, Xiaolan Chang,  
Dongyang Huang\*

Department of Cell Biology and Genetics and Key Laboratory of Molecular Biology in High  
Cancer Incidence Coastal Chaoshan Area of Guangdong Higher Education Institutes, Shantou  
University Medical College, Shantou 515041, China

\*Correspondence to: Dongyang Huang; E-mail: huangdy@stu.edu.cn

A

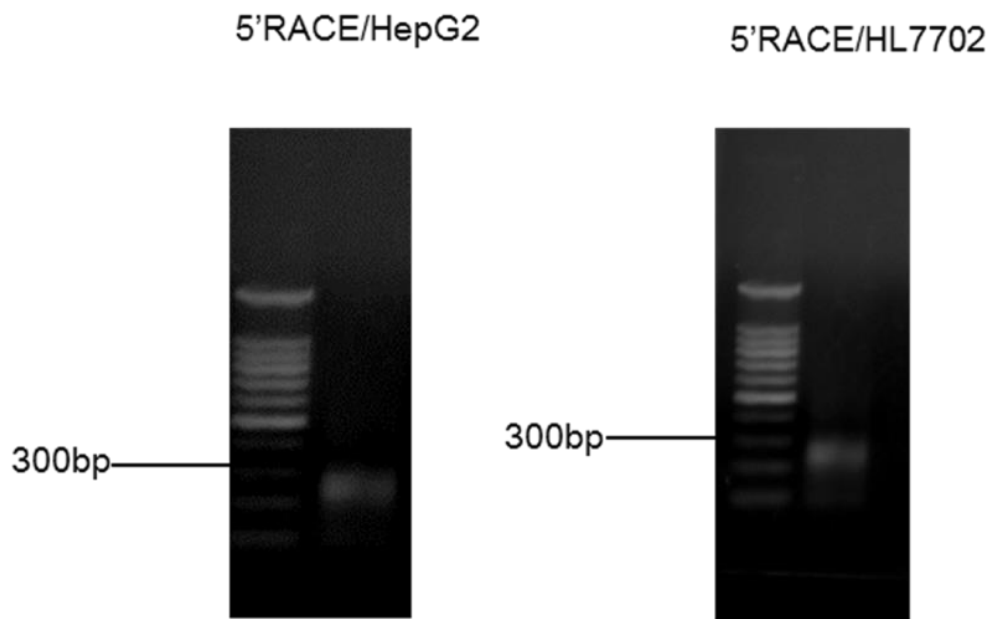

B<sub>Chr14 q11.2</sub>

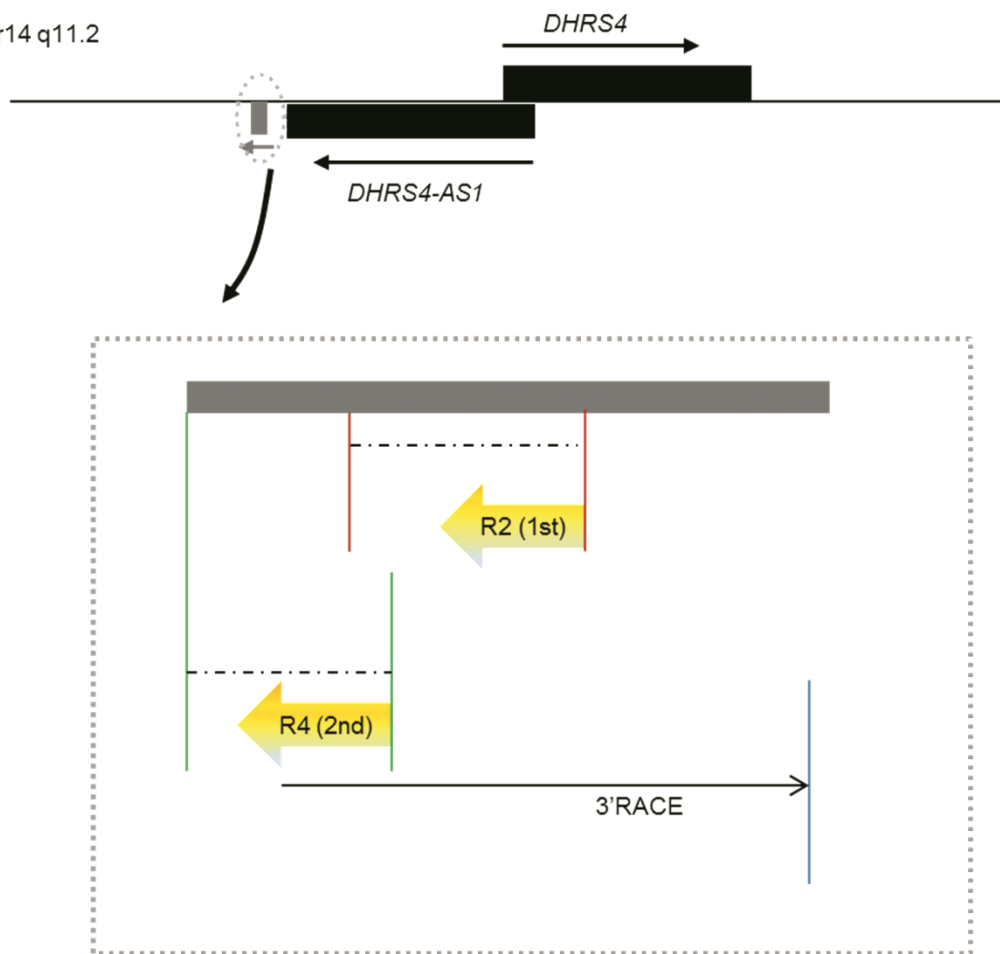

C

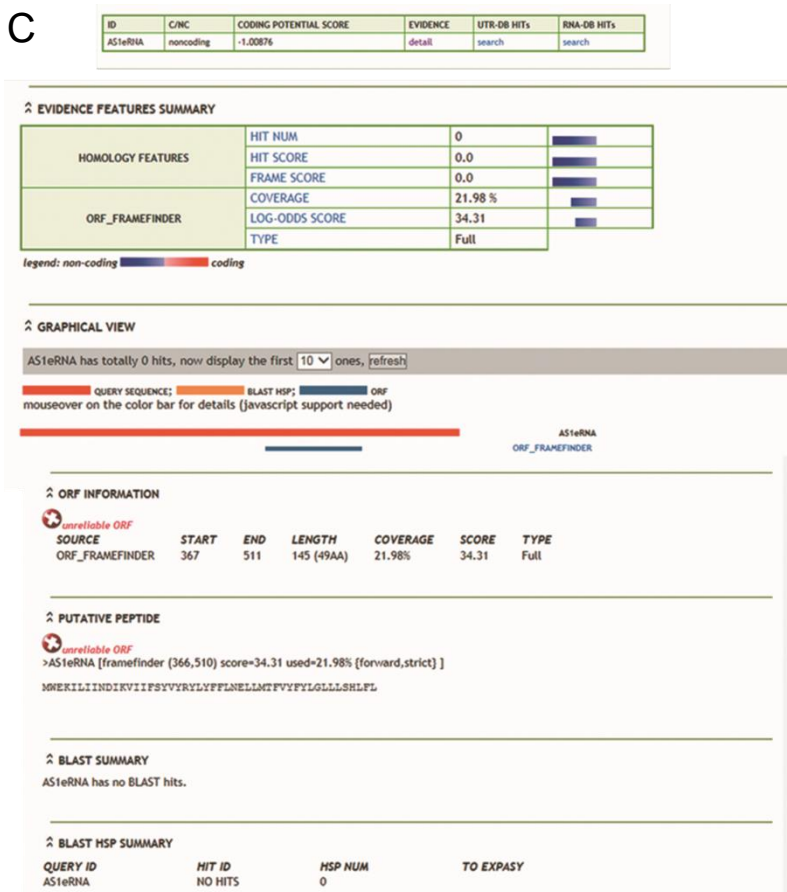

**Figure S1. The AS1 enhancer produces eRNA.** (A) 5' RACE was performed to determine the 5' end of AS1eRNA. (B) Schematic representation of the orientation of the primer extension used in the 5' RACE and 3' RACE shows the location of AS1eRNA relative to the *DHRS4-AS1* gene locus. R2 and R4 represent the 5' RACE outer and inner primers, respectively. The single-exon polyadenylated AS1eRNA was determined by RACE-PCR followed by DNA sequencing. (C) Snapshot from the Coding Potential Calculator (CPC) website is shown to discriminate AS1eRNA as “noncoding” with a coding potential score of -1.00876. Further evidence provided by CPC showed that there were no predicted protein functional domains, and no BLAST hits in the “unreliable ORF” of AS1eRNA.

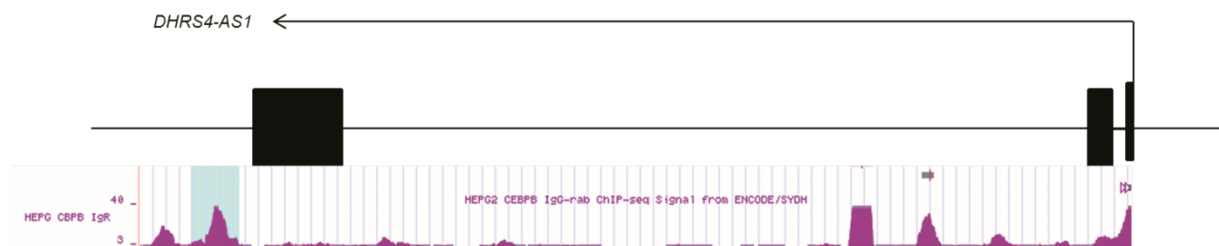

Figure S2: ENCODE tracks from the UCSC Genome Browser illustrate that the enrichment of CEBPbeta at the AS1 enhancer and the *DHRS4-AS1* promoter in HepG2 cells. The light blue rectangle represents the AS1 enhancer region.

**Table S1: Homology comparisons between *DHRS4-AS1* and its corresponding putative NAT regions**

| Name                       | Overlapping DNA sequences | Predicted promoter regions |
|----------------------------|---------------------------|----------------------------|
| DHRS4-AS1 vs DHRS4L2-AS1   | 90%                       | 98%                        |
| DHRS4-AS1 vs DHRS4L1-AS1   | 90%                       | 91%                        |
| DHRS4L2-AS1 vs DHRS4L1-AS1 | 93%                       | 92%                        |

**Table S2. Primers for qPCR**

| Name         | Sequences                   |
|--------------|-----------------------------|
| DHRS4- AS1-F | F: GCCTTGTGCATGGATCAGAC     |
| DHRS4- AS1-R | R: GACCATCCCTGTGTGTTAGTGAG  |
| AS1Erna-F    | F: AAGGGCAAGGAGTGTGTCTTT    |
| AS1eRNA-R    | R: CACCATTACACAGGACTGCCT    |
| β-actin-F    | F: CTGGAACGGTGAAGGTGACA     |
| β-actin-R    | R: AAGGGACTTCCTGTAACAATGCA  |
| c-MYC-F      | F: CTTCTCTCCGTCCTCGGATTC    |
| c-MYC-R      | R: CAGAAGGTGATCCAGACTCTGACC |

**Table S3. SiRNA oligonucleotides**

| Name                  | Sequences             |
|-----------------------|-----------------------|
| Sicontrol sense       | UUCUCCGAACGUGUCACGUTT |
| Sicontrol antisense   | ACGUGACACGUUCGGAGAATT |
| AS1eRNA-si1 sense     | GUAGUACAUAGAGUCCUGTT  |
| AS1eRNA-si1 antisense | CAGGGACUCUAUGUACUACTT |
| AS1eRNA-si2 sense     | CACUCAGCUUUAACAAACATT |
| AS1eRNA-si2 antisense | UGUUUGUUAAGCUGAGUGTT  |

**Table S4. Primers for dual-luciferase reporter assay**

| Primer name               | Sequences                            |
|---------------------------|--------------------------------------|
| U-F-forward primer        | CGACGCGTCGAGTACTATTGATCCAGAGGTGACC   |
| U-F-reverse primer        | GAAGATCTTAATCATGACACAAAACCTCAGAAGC   |
| U-R-forward primer        | GAAGATCTGAGTACTATTGATCCAGAGGTGACC    |
| U-R-reverse primer        | CGACGCGTCTAATCATGACACAAAACCTCAGAAGC  |
| D-F/D-R-forward primer    | ACGCGTCGACGAGTACTATTGATCCAGAGGTGACC  |
| D-F/D-R-reverse primer    | ACGCGTCGACTAATCATGACACAAAACCTCAGAAGC |
| Random DNA-forward primer | ACGCGTCGACGCATAAGCAAAGGCCCTGAC       |
| Random DNA-reverse primer | ACGCGTCGACTTCACCCTCACAGGATTGGC       |

**Table S5. Primers for 3C array**

| Name                                  | Sequences                  |
|---------------------------------------|----------------------------|
| <i>Hind</i> III-Anchor primer1        | AATAGAAGAGTATGGCAGTTCAGAGG |
| <i>Hind</i> III-Anchor primer2        | GGAGAGAGTATTTTTAGTTGGG     |
| F1                                    | GAGCTGTTTGTCTGTGTTCTGATAG  |
| F2                                    | AGACTGAGAAGCAGTGCTGGTTC    |
| F3                                    | TCCATGTAAAGTGCTACCTTCAGG   |
| F4                                    | AGGAGTATGTTTGTGGTGTCTCTG   |
| F5                                    | CTCTGTTTGCCTGGGTATCACTAG   |
| ERCC3-F                               | CCCTACCCCATGTAGTGAATCC     |
| ERCC3-R                               | ACTCCAAGGGTTATTTTGATGTTG   |
| <i>Eco</i> RI-enhancer anchor         | ACATCCCGAAGGTGTGATGC       |
| <i>Eco</i> RI-L1-antisense promoter   | GAAGCCGATCCTGTGAGCAG       |
| <i>Hind</i> III-L2-antisense promoter | AGGATCTCATATCCCTCGC        |
| Loading primer-F                      | CACTTCCCCAAGAAGAAAACGTG    |
| Loading primer-R                      | CGGGCTGGTGAGTGATCAAAG      |

**Table S6. Primers for RACE**

| Usage                                 | Primer name                  | Sequences                                                                                  |
|---------------------------------------|------------------------------|--------------------------------------------------------------------------------------------|
| 5' RACE<br>(1st round for nested PCR) | UPM                          | CTAATACGACTCACTATAGGGCAAGCAGTGG<br>TATCAACGCAGAGT (long)<br>CTAATACGACTCACTATAGGGC (short) |
|                                       | AS1eRNA outer                | GACTGCCTTTCAGGAAGGTTCTCTGC                                                                 |
|                                       | NUP                          | AAGCAGTGGTATCAACGCAGT                                                                      |
| 5' RACE<br>(2nd round for nested PCR) | AS1eRNA inner                | GACACACTCCTTGCCCTTGTACTTCAAC                                                               |
|                                       | 3' RACE                      | TACCGTCGTTCCACTAG                                                                          |
|                                       | AS1eRNA 3' RACE outer primer | CTCTAAGGCATGATGTTGCAGTAG                                                                   |

**Table S7: Primers for BSP**

| <b>Name</b>      | <b>Sequences</b>             |
|------------------|------------------------------|
| DHRS4-AS-CGI-F   | F: TGTAAGGTTTGAGGATAGGG      |
| DHRS4-AS-CGI-R   | R: AATTCCTACAAAACCAAAAA      |
| DHRS4L2-AS-CGI-F | F: TGGTTATTTGTATGGATTAGATTAG |
| DHRS4L2-AS-CGI-R | R: AAAAAACAACAACCAAAATCTAC   |
| DHRS4L1-AS-CGI-F | F: TATTAGGGTTATTTTATTTGTGAG  |
| DHRS4L1-AS-CGI-R | R: AAAAAACAACAACCAAAAACTAC   |

**Table S8. Primers for ChIP**

| <b>Primer name</b> | <b>Sequences</b>         |
|--------------------|--------------------------|
| DHRS4-AP-F         | ACGACCACATGGGCCCC        |
| DHRS4-AP-F         | ACATAGTAGGCACACGTAGGGG   |
| DHRS4L2-AP-F       | GGAAGAGGTTCGACAGCATGG    |
| DHRS4L2-AP -R      | GAACTAAGGCTGTGATCCAGGTC  |
| L1-AP1-F           | GACTACCACGTGGGCCCC       |
| L1-AP1-R           | CTTCAGAGCCCATGCTGTCC     |
| L1-AP2-F           | CCGATCCTGTGAGCAGAGAC     |
| L1-AP2-R           | CGTAGTAGAGACACATGGAGGTC  |
| L1-AP3-F           | TGTGTGGCATGTGGCAAAGAC    |
| L1-AP3-R           | CCCAGAAGGAAGTTTTTATCAACG |
| L1-AP4-F           | CTCTCTTGCCATGTAACGCG     |
| L1-AP4-R           | GGTTTACACTTCTGCAGACTGCAG |
| AS1enhancer-F      | AAGAAGGCTCTTTGTTGGGC     |
| AS1enhancer-R      | GGGATTGCTCAAGGTAGAAGG    |
